# Supplementary material for: Understanding Fish Larvae’s Feeding Biology to Improve Aquaculture Feeding Protocols
Source: MDPI journal article supplement (doi:10.3390/oceans3010009), 2022-03-21
Supplement: s1 [file s1]

# Understanding Fish Larvae's Feeding Biology to Improve Aquaculture Feeding Protocols

## Supplementary Material

**Table S1.** Feeding incidence (FInc) of *Sparus aurata* larvae from different experimental conditions <sup>1</sup>. Values indicate the percentage of larvae with food in the gut for each experimental unit (n = 15).

| Trial | Age | Time (min) | FInc % | Trial    | Age | Time (min) | FInc % |
|-------|-----|------------|--------|----------|-----|------------|--------|
| Time  | 27  | 0          | 0.00   | 0 lux    | 38  | 10         | 13.33  |
| Time  | 27  | 0          | 0.00   | 0 lux    | 38  | 10         | 40.00  |
| Time  | 27  | 0          | 0.00   | 0 lux    | 38  | 10         | 33.33  |
| Time  | 27  | 10         | 66.67  | 0 lux    | 38  | 30         | 40.00  |
| Time  | 27  | 10         | 46.67  | 0 lux    | 38  | 30         | 93.30  |
| Time  | 27  | 10         | 66.67  | 0 lux    | 38  | 30         | 80.00  |
| Time  | 27  | 20         | 73.33  | 0 lux    | 49  | 10         | 100.00 |
| Time  | 27  | 20         | 73.33  | 0 lux    | 49  | 10         | 100.00 |
| Time  | 27  | 20         | 86.67  | 0 lux    | 49  | 10         | 100.00 |
| Time  | 27  | 30         | 86.67  | 0 lux    | 49  | 30         | 100.00 |
| Time  | 27  | 30         | 73.33  | 0 lux    | 49  | 30         | 100.00 |
| Time  | 27  | 30         | 40.00  | 0 lux    | 49  | 30         | 100.00 |
| Time  | 27  | 40         | 46.67  | 400 lux  | 38  | 10         | 100.00 |
| Time  | 27  | 40         | 86.67  | 400 lux  | 38  | 10         | 100.00 |
| Time  | 27  | 40         | 80.00  | 400 lux  | 38  | 10         | 100.00 |
| Time  | 27  | 80         | 100.00 | 400 lux  | 38  | 30         | 100.00 |
| Time  | 27  | 80         | 73.33  | 400 lux  | 38  | 30         | 100.00 |
| Time  | 27  | 80         | 86.67  | 400 lux  | 38  | 30         | 100.00 |
| Time  | 42  | 0          | 0.00   | 400 lux  | 49  | 10         | 100.00 |
| Time  | 42  | 0          | 0.00   | 400 lux  | 49  | 10         | 100.00 |
| Time  | 42  | 0          | 0.00   | 400 lux  | 49  | 10         | 100.00 |
| Time  | 42  | 10         | 100.00 | 400 lux  | 49  | 30         | 100.00 |
| Time  | 42  | 10         | 100.00 | 400 lux  | 49  | 30         | 100.00 |
| Time  | 42  | 10         | 100.00 | 400 lux  | 49  | 30         | 100.00 |
| Time  | 42  | 20         | 100.00 | 1000 lux | 38  | 10         | 100.00 |
| Time  | 42  | 20         | 100.00 | 1000 lux | 38  | 10         | 100.00 |
| Time  | 42  | 20         | 100.00 | 1000 lux | 38  | 10         | 100.00 |
| Time  | 42  | 30         | 100.00 | 1000 lux | 38  | 30         | 100.00 |
| Time  | 42  | 30         | 100.00 | 1000 lux | 38  | 30         | 100.00 |
| Time  | 42  | 30         | 100.00 | 1000 lux | 38  | 30         | 100.00 |
| Time  | 42  | 40         | 100.00 | 1000 lux | 49  | 10         | 100.00 |

|      |    |    |        |          |    |    |        |
|------|----|----|--------|----------|----|----|--------|
| Time | 42 | 40 | 100.00 | 1000 lux | 49 | 10 | 100.00 |
| Time | 42 | 40 | 100.00 | 1000 lux | 49 | 10 | 100.00 |
| Time | 42 | 80 | 100.00 | 1000 lux | 49 | 30 | 100.00 |
| Time | 42 | 80 | 100.00 | 1000 lux | 49 | 30 | 100.00 |
| Time | 42 | 80 | 100.00 | 1000 lux | 49 | 30 | 100.00 |

<sup>1</sup> Temperature trial was not included in the table since FInc was 100% for all larvae.

**Table S2.** Kruskal–Wallis non-parametric test statistical analysis of *Sparus aurata* larvae feeding intensity under different experimental conditions. Bold and italicized values indicate significant differences.

| FI (n prey)           |                |              |              |
|-----------------------|----------------|--------------|--------------|
| 1. TIME AFTER FEEDING |                | 27 DPH       | 42 DPH       |
| Chi-Square            |                | 38,756       | 123,661      |
| df                    |                | 4            | 4            |
| Asymp. Sig.           |                | <b>0.000</b> | <b>0.000</b> |
| LIGHT                 | Time (minutes) | 38 DPH       | 49 DPH       |
| Chi-Square            | 10             | 91.403       | 91.403       |
| df                    |                | 2            | 2            |
| Asymp. Sig.           |                | <b>0.000</b> | <b>0.000</b> |
| Chi-Square            | 30             | 87.901       | 29.844       |
| df                    |                | 2            | 2            |
| Asymp. Sig.           |                | <b>0.000</b> | <b>0.000</b> |
| TEMPERATURE           |                | 41 DPH       |              |
| Chi-Square            | 10             | 40.602       |              |
| df                    |                | 2            |              |
| Asymp. Sig.           |                | <b>0.000</b> |              |
| Chi-Square            | 30             | 29.120       |              |
| df                    |                | 2            |              |
| Asymp. Sig.           |                | <b>0.000</b> |              |

**Table S3.** Paired comparisons using Mann–Whitney U test when significant differences were identified with Kruskal–Wallis test; A) time after feeding at 27 and 42 days post-hatching (DPH); B) light levels (0, 400, and 1000 lux) at 38 and 49 DPH, 10 and 30 min after feeding; C) temperature (17, 19, and 25 °C) at 41 DPH, 10 and 30 min after feeding. Bold and italicized values indicate significant differences.

(A)

| Age (DPH) | Time (min) | Statistical descriptor | 20           | 30           | 40           | 80           |
|-----------|------------|------------------------|--------------|--------------|--------------|--------------|
| 27        | 10         | Mann–Whitney U         | 727.5        | 771.5        | 713          | 341.5        |
|           |            | Z                      | -2.343       | -1.992       | -2.47        | -5.473       |
|           |            | Asymp. Sig. (2-tailed) | <b>0.019</b> | <b>0.046</b> | <b>0.014</b> | <b>0.000</b> |
|           | 20         | Mann–Whitney U         |              | 1006         | 974.5        | 480.5        |
|           |            | Z                      |              | -0.053       | -0.31        | -4.31        |
|           |            | Asymp. Sig. (2-tailed) |              | 0.958        | 0.757        | <b>0.000</b> |
|           | 30         | Mann–Whitney U         |              |              | 980.5        | 525.5        |
|           |            | Z                      |              |              | -0.261       | -3.951       |
|           |            | Asymp. Sig. (2-tailed) |              |              | 0.794        | <b>0.000</b> |
|           | 40         | Mann–Whitney U         |              |              |              | 506          |
|           |            | Z                      |              |              |              | -4.107       |
|           |            | Asymp. Sig. (2-tailed) |              |              |              | <b>0.000</b> |
| 42        | 10         | Mann–Whitney U         | 427.5        | 176.5        | 128          | 34.5         |
|           |            | Z                      | -4.722       | -6.747       | -7.138       | -7.893       |
|           |            | Asymp. Sig. (2-tailed) | <b>0.000</b> | <b>0.000</b> | <b>0.000</b> | <b>0.000</b> |
|           | 20         | Mann–Whitney U         |              | 543.5        | 448.5        | 143.5        |
|           |            | Z                      |              | -3.785       | -4.31        | -7.013       |
|           |            | Asymp. Sig. (2-tailed) |              | <b>0.000</b> | <b>0.000</b> | <b>0.000</b> |
|           | 30         | Mann–Whitney U         |              |              | 802.5        | 307.5        |
|           |            | Z                      |              |              | -1.695       | -5.69        |
|           |            | Asymp. Sig. (2-tailed) |              |              | <b>0.09</b>  | <b>0.000</b> |
|           | 40         | Mann–Whitney U         |              |              |              | 447.5        |
|           |            | Z                      |              |              |              | -4.559       |
|           |            | Asymp. Sig. (2-tailed) |              |              |              | <b>0.000</b> |

**Table S3. (cont)** Paired comparisons using Mann–Whitney U test when significant differences were identified with Kruskal–Wallis test; A) time after feeding at 27 and 42 days post-hatching (DPH); B) light levels (0, 400, and 1000 lux) at 38 and 49 DPH, 10 and 30 min after feeding; C) temperature (17, 19, and 25 °C) at 41 DPH, 10 and 30 min after feeding. Bold and italicized values indicate significant differences.

(B)

|           |            |     |                        | 10 min |        |
|-----------|------------|-----|------------------------|--------|--------|
| Age (DPH) | Time (min) | Lux |                        | 400    | 1000   |
| 38        | 10         | 0   | Mann–Whitney U         | 3.5    | 0      |
|           |            |     | Z                      | -8.334 | -8.362 |
|           |            |     | Asymp. Sig. (2-tailed) | 0.000  | 0.000  |
|           |            | 400 | Mann–Whitney U         |        | 818.5  |
|           |            |     | Z                      |        | -1.567 |
|           |            |     | Asymp. Sig. (2-tailed) |        | 0.117  |
| 49        | 10         | 0   | Mann–Whitney U         | 168    | 237    |
|           |            |     | Z                      | -6.815 | -6.258 |
|           |            |     | Asymp. Sig. (2-tailed) | 0.000  | 0.000  |
|           |            | 400 | Mann–Whitney U         |        | 744.5  |
|           |            |     | Z                      |        | -2.163 |
|           |            |     | Asymp. Sig. (2-tailed) |        | 0.031  |
| 30 min    |            |     |                        |        |        |
| 38        | 30         | 0   | Mann–Whitney U         | 16.5   | 2      |
|           |            |     | Z                      | -8.055 | -8.171 |
|           |            |     | Asymp. Sig. (2-tailed) | 0.000  | 0.000  |
|           |            | 400 | Mann–Whitney U         |        | 967    |
|           |            |     | Z                      |        | -0.367 |
|           |            |     | Asymp. Sig. (2-tailed) |        | 0.713  |
| 49        | 30         | 0   | Mann–Whitney U         | 475.5  | 387    |
|           |            |     | Z                      | -4.334 | -5.048 |
|           |            |     | Asymp. Sig. (2-tailed) | 0.000  | 0.000  |
|           |            | 400 | Mann–Whitney U         |        | 939.5  |
|           |            |     | Z                      |        | -0.589 |
|           |            |     | Asymp. Sig. (2-tailed) |        | 0.556  |

| Minutes |                        | 38 and 49 (age)      |              |              |
|---------|------------------------|----------------------|--------------|--------------|
|         |                        | 0                    | 400          | 1000         |
| 10      | Mann–Whitney U         | 1                    | 0            | 0            |
|         | Z                      | -8.353               | -8.172       | -8.172       |
|         | Asymp. Sig. (2-tailed) | <b>0.000</b>         | <b>0.000</b> | <b>0.000</b> |
| 30      | Mann–Whitney U         | 0                    | 0.000        | 0            |
|         | Z                      | -8.187               | -8.172       | -8.172       |
|         | Asymp. Sig. (2-tailed) | <b>0.000</b>         | <b>0.000</b> | <b>0.000</b> |
| age     |                        | 10 and 30 (minutes ) |              |              |
|         |                        | 0                    | 400          | 1000         |
| 38      | Mann–Whitney U         | 467.5                | 360.5        | 461.5        |
|         | Z                      | -4.708               | -5.264       | -4.449       |
|         | Asymp. Sig. (2-tailed) | <b>0.000</b>         | <b>0.000</b> | <b>0.000</b> |
| 49      | Mann–Whitney U         | 65.5                 | 17.000       | 7.5          |
|         | Z                      | -7.642               | -8.034       | -8.11        |
|         | Asymp. Sig. (2-tailed) | <b>0.000</b>         | <b>0.000</b> | <b>0.000</b> |

4.

3.

**Table S3 (cont.)** Paired comparisons using Mann–Whitney U test when significant differences were identified with Kruskal–Wallis test; A) time after feeding at 27 and 42 days post-hatching (DPH); B) light levels (0, 400, and 1000 lux) at 38 and 49 DPH, 10 and 30 min after feeding; C) temperature (17, 19, and 25 °C) at 41 DPH, 10 and 30 min after feeding. Bold and italicized values indicate significant differences.

(C)

| Min |       |                        | 19 °C  | 25 °C        |
|-----|-------|------------------------|--------|--------------|
| 10  | 17 °C | Mann–Whitney U         | 945    | 301          |
|     |       | Z                      | -0.545 | -5.743       |
|     |       | Asymp. Sig. (2-tailed) | 0.586  | <b>0.000</b> |
|     | 19 °C | Mann–Whitney U         |        | <b>.000</b>  |
|     |       | Z                      |        | -8.172       |
|     |       | Asymp. Sig. (2-tailed) |        | <b>0.000</b> |
| 30  | 17 °C | Mann–Whitney U         | 959.5  | 447          |
|     |       | Z                      | -0.428 | -4.564       |
|     |       | Asymp. Sig. (2-tailed) | 0.669  | <b>0.000</b> |
|     | 19 °C | Mann–Whitney U         |        | 424.500      |
|     |       | Z                      |        | -4.746       |
|     |       | Asymp. Sig. (2-tailed) |        | <b>0.000</b> |

| 10 and 30 min          |              |              |              |
|------------------------|--------------|--------------|--------------|
|                        | 17 °C        | 19 °C        | 25 °C        |
| Mann–Whitney U         | 193          | 288.5        | 302.500      |
| Z                      | -6.615       | -5.844       | -5.730       |
| Asymp. Sig. (2-tailed) | <b>0.000</b> | <b>0.000</b> | <b>0.000</b> |

**Table S4.** Summary of the statistical analysis of one-way ANOVA or two-way ANOVA used for comparisons of CCK levels of *Sparus aurata* larvae under different experimental conditions: A) time after feeding at 27 and 42 days post-hatching (DPH); B) light levels (0, 400, and 1000 lux) at 38 and 49 DPH, 10 and 30 min after feeding; C) temperature (17, 19, and 25 °C) at 41 DPH, 10 and 30 min after feeding. Bold and italicized values indicate significant differences.

**(A) Feeding over time**

| Feeding over time                     |    | ANOVA Sig.   |
|---------------------------------------|----|--------------|
| Comparing among different times at 27 |    | 0.189        |
| Comparing among different times at 42 |    | <b>0.008</b> |
| Comparing between 27 and 42 DPH at:   | 0  | <b>0.055</b> |
|                                       | 10 | 0.559        |
|                                       | 20 | 0.051        |
|                                       | 30 | <b>0.002</b> |
|                                       | 80 | 0.139        |

**(B) Light intensity**

| Light intensity | Minutes after feeding | Age          | Light        | Age *<br>Light |
|-----------------|-----------------------|--------------|--------------|----------------|
| Two-way ANOVA   | 10                    | <b>0.000</b> | 0.125        | 0.358          |
|                 | 30                    | <b>0.000</b> | <b>0.000</b> | <b>0.000 *</b> |

\* Since significant interaction was observed between factors, a one-way ANOVA was used.

| Light intensity            |       |               | ANOVA sig.   |
|----------------------------|-------|---------------|--------------|
| Among different treatments | 38    | 10 min        | 0.847        |
|                            |       | 30 min        | <b>0.000</b> |
| Among different treatments | 49DPH | 10 min        | 0.136        |
|                            |       | 30 min        | <b>0.032</b> |
| At 0 lux                   | 38    | 10 and 30 min | <b>0.001</b> |
| At 400 lux                 |       |               | 0.568        |
| At 1000 lux                |       |               | 0.909        |
| At 0 lux                   | 49DPH | 10 and 30 min | 0.672        |
| At 400 lux                 |       |               | <b>0.000</b> |
| At 1000 lux                |       |               | <b>0.006</b> |

**(C) Temperature**

| Trial         | Temperature | Time after feeding | T*t   |
|---------------|-------------|--------------------|-------|
| Two-way ANOVA | 0.900       | 0.677              | 0.911 |

**Table S5.** Two-way ANOVA results for digestive enzyme activities of *Sparus aurata* fed at different temperatures: T – temperature; t – time in minutes. Bold and italicized values indicate significant differences.

| Digestive enzymes    | T °C         | Time min | T x t |
|----------------------|--------------|----------|-------|
| Trypsin              | 0.441        | 0.130    | 0.475 |
| Amylase              | 0.460        | 0.736    | 0.630 |
| Alkaline phosphatase | <b>0.001</b> | 0.085    | 0.377 |
| Aminopeptidase       | 0.240        | 0.201    | 0.512 |

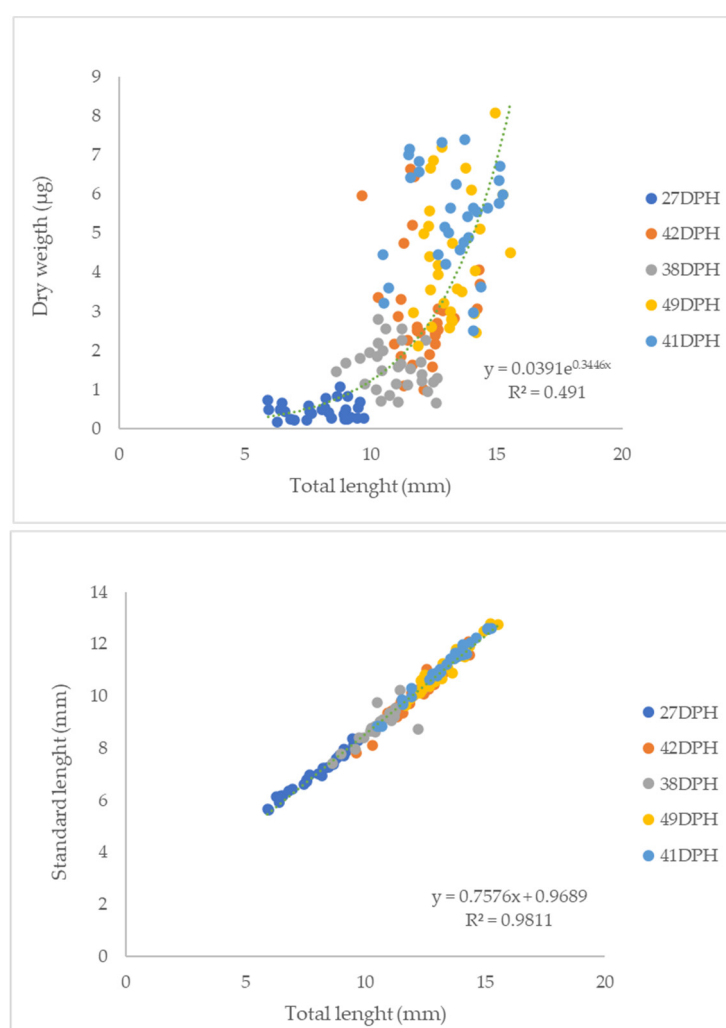

**Figure S1.** Plot of dry weight with total length (A) and standard length and total length (B) for *Sparus aurata* larvae in the short-term trials (time—27 and 42 DPH; light—38 and 49 DPH; temperature—41 DPH).

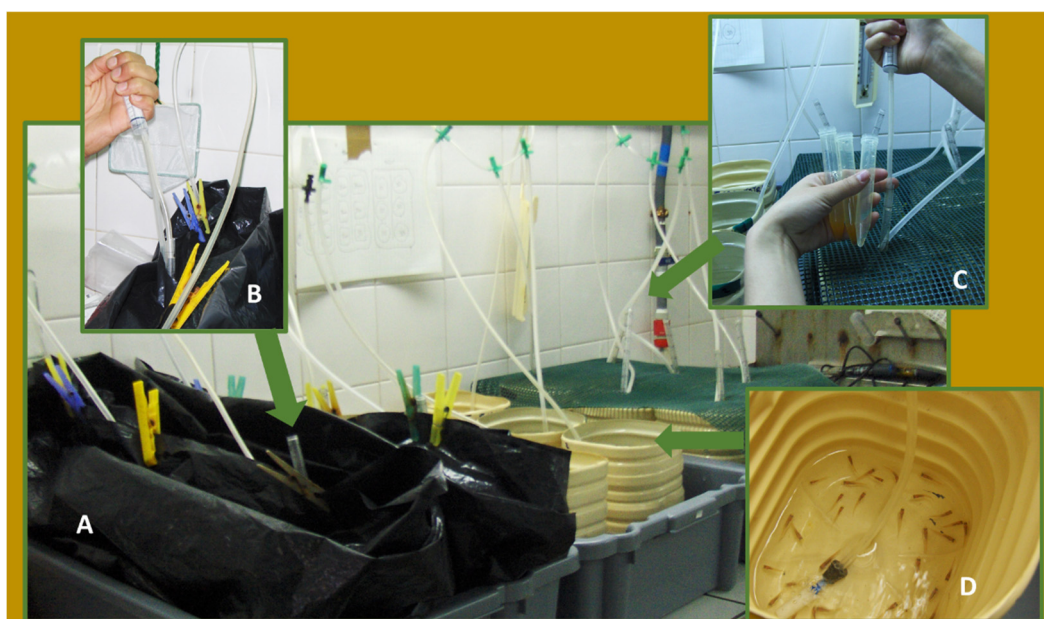

**Figure S2.** Experimental set-up for light trial (A); fish larvae were fed using a syringe, to maintain light treatment (B,C). Detail of gilthead seabream post-larvae in experimental unit during sampling.
